# Supplementary material for: Comparison of Associations between MIND and Mediterranean Diet Scores with Patient-Reported Outcomes in Parkinson’s Disease
Source: MDPI journal article supplement (doi:10.3390/nu14235185), 2022-12-06
Supplement: s1 [file s1]

**Table S1.** Patient-Reported Outcomes in Parkinson's Disease (PRO-PD) scoring items. PRO-PD symptoms inclusion for total scale (left), non-motor symptoms (middle), and motor symptoms (right).

| Total Pro-PD                | Non-motor PRO-PD            | Motor PRO-PD                |
|-----------------------------|-----------------------------|-----------------------------|
| Slowness                    | Constipation                | Handwriting or Typing       |
| Tremor                      | Motivation/initiative       | Slowness                    |
| Balance                     | Depression                  | Tremor                      |
| Fatigue                     | Withdrawn                   | Stooped posture             |
| Sleepy                      | Anxiety                     | Difficulty walking          |
| Motivation/initiative       | Fatigue                     | Difficulty speaking         |
| Constipation                | Daytime sleepiness          | Rising from seated position |
| Walking                     | Visual disturbance          | Dressing                    |
| Rising from seated position | Insomnia                    | Restless legs               |
| Dressing                    | REM Sleep Behavior Disorder | Falling                     |
| Freezing                    | Muscle pain                 | Balance                     |
| Falling                     | Drooling                    | Freezing                    |
| Handwriting or Typing       | Memory/forgetfulness        |                             |
| Drooling                    | Comprehension               |                             |
| Speech                      | Sexual dysfunction          |                             |
| Visual disturbance          | Urinary symptoms            |                             |
| Muscle pain                 | Hallucinations              |                             |
| Restless legs               |                             |                             |
| REM Sleep Behavior Disorder |                             |                             |
| Insomnia                    |                             |                             |
| Smell                       |                             |                             |
| Nausea                      |                             |                             |
| Depression                  |                             |                             |
| Anxiety                     |                             |                             |
| Withdrawn                   |                             |                             |
| Dizziness                   |                             |                             |
| Stoop posture               |                             |                             |
| Memory/forgetfulness        |                             |                             |
| Comprehension               |                             |                             |
| Sexual dysfunction          |                             |                             |
| Urinary symptoms            |                             |                             |
| Dyskinesia                  |                             |                             |
| Hallucinations              |                             |                             |

**Table S2: Mediterranean Diet questionnaire on dietary habits and consumption frequency**

| Questionnaire Items                                                                                                                         | Criteria for 1 point          |
|---------------------------------------------------------------------------------------------------------------------------------------------|-------------------------------|
| Do you use olive oil as a main culinary fat?                                                                                                | Primary cooking fat           |
| Do you consume more than 4 tablespoons of olive oil in a given day                                                                          | ≥ 4 Tbs                       |
| Do you consume more than 2 vegetable servings per day, with at least one of the portions raw or as a salad?                                 | > 2 servings/day with ≥ 1 raw |
| Do you consume 3 or more fruit units per day?                                                                                               | ≥ 3 servings/day              |
| Do you consume less than 1 serving per day of red meat, hamburger, or meat products?                                                        | <1 Serving/day                |
| Do you consume less than 1 serving per day of butter, margarine, or cream?                                                                  | <1 Serving/day                |
| Do you consume less than 1 sweet or carbonated beverage drink per day?                                                                      | <1 beverage/day               |
| Do you drink 7 or more glasses of wine per week?                                                                                            | >7 glasses/week               |
| Do you consume 3 or more servings of legumes per week?                                                                                      | ≥3 servings/week              |
| Do you consume 3 or more servings of fish or shellfish per week?                                                                            | ≥3 servings/week              |
| Do you consume less than 3 servings per week of commercial sweets or pastries (not homemade), such as cakes, cookies, biscuits, or custard? | <3 servings/week              |
| Do you consume 3 or more servings of nuts per week?                                                                                         | ≥ 3 servings/week             |
| Do you preferentially consume chicken, turkey, or rabbit meat?                                                                              | Yes                           |
| Do you consume vegetables, pasta, rice, or other dishes seasoned with sofrito at least 2 times per week?                                    | ≥ 2 servings/week             |

**Table S3: Mediterranean-DASH Intervention for Neurodegenerative Delay (MIND) diet components from the Food Frequency Questionnaire**

| Mediterranean-DASH Intervention for Neurodegenerative Delay (MIND) Diet Scoring System |                        |                                    |                    |
|----------------------------------------------------------------------------------------|------------------------|------------------------------------|--------------------|
|                                                                                        | Points Assigned        |                                    |                    |
| Questionnaire Items                                                                    | 0                      | 0.5                                | 1                  |
| Green Leafy Vegetables                                                                 | ≤ 2 servings/week      | 3 to 5 servings/week               | ≥ 6 serving/week   |
| Other Vegetables                                                                       | ≤ 4 servings/week      | 4 to 6 servings/week               | ≥ 1 serving/day    |
| Berries                                                                                | < 1 serving/week       | 1 serving/week                     | ≥ 2 serving        |
| Nuts                                                                                   | Less than once a month | 1 serving/month to 4 servings/week | ≥ 5 servings/week  |
| Olive Oil                                                                              | Not a primary oil      | -                                  | Is the primary oil |
| Butter, Margarine                                                                      | ≥ 2 Tbs /day           | 1 to 2 Tbs /day                    | ≤ 1 Tbs /day       |
| Cheese                                                                                 | ≥7 servings/week       | 1 to 6 servings/week               | <1 serving/week    |
| Whole Grains                                                                           | ≤ 1 serving/week       | 1 to 2 servings/day                | ≥3 servings/week   |
| Fish (not fried)                                                                       | Rarely                 | 1 to 3 meals/month                 | ≥ 1 meal/week      |
| Beans                                                                                  | < 1 meal /week         | 1 to 3 meals/week                  | ≥ 4 meals/week     |
| Poultry (not fried)                                                                    | < 1 meal/week          | 1 meal/week                        | ≥ 2 meals/week     |
| Red Meat and Products                                                                  | > 6 meals/week         | 4 to 6 meals/week                  | ≤ 3 meals/week     |
| Fast Fried Foods                                                                       | ≥ 4 meals/week         | 1 to 3 meals/week                  | <1 meal/week       |
| Pastries and Sweets                                                                    | ≥ 7 times/week         | 5 to 6 times/week                  | ≤ 4 times/week     |
| Wine                                                                                   | Never                  | 1/month to 6/week                  | 1 glass/day        |
| Total Score                                                                            | 0                      | 7.5                                | 15                 |

Table S4: Individual items on MIND and Mediterranean Questionnaires and association with Patient Reported Outcomes in Parkinson's Disease symptom severity by linear regressions adjusted for age, gender, income, and years since diagnosis. Reverse coded items were adjusted to reflect higher consumption.

| The Relationship Between Individual Questions on the MIND and Mediterranean Questionnaires:<br>Associations with Patient-Reported Parkinson Disease Symptoms Over Time |            |                                                |         |
|------------------------------------------------------------------------------------------------------------------------------------------------------------------------|------------|------------------------------------------------|---------|
| Mediterranean Diet Adherence Questionnaire                                                                                                                             | Mean Score | Estimated Impact of Question on overall PRO-PD | p-value |
| Do you consume less than 1 sweet or carbonated beverage drink per day?                                                                                                 | 0.80       | -135 (-203- -68.2)                             | <0.001  |
| Do you consume 3 or more servings of nuts (including peanuts) per week?                                                                                                | 0.68       | -102 (-161 - -43.6)                            | 0.005   |
| Do you consume less than 1 serving per day of red meat, hamburger, or meat products?                                                                                   | 0.76       | -95 (-156 - -28.3)                             | 0.04    |
| Do you consume more than 2 vegetable servings per day, with at least one of the portions raw or as a salad?                                                            | 0.70       | -95 (-156- -35.5)                              | 0.02    |
| Do you consume less than 1 serving per day of butter, margarine, or cream?                                                                                             | 0.70       | -67.7 (-127 - -8.57)                           | 0.1     |
| Do you consume less than 3 servings per week of commercial sweets or pastries (not homemade), such as cakes, cookies, biscuits, or custard?                            | 0.55       | -54.0 (-109 - 0.442)                           | 0.3     |
| Do you consume 3 or more fruit units (including natural fruit juices) per day?                                                                                         | 0.60       | -47.9 (-103 - 7.68)                            | 0.5     |
| Do you use olive oil as a main culinary fat?                                                                                                                           | 0.77       | -46.0 (-112 - 19.7)                            | 0.7     |
| Do you consume vegetables, pasta, rice, or other dishes seasoned with sofrito at least 2 times per week?                                                               | 0.38       | 45.0 (-11.6 -102)                              | 0.5     |
| Do you consume 3 or more servings of legumes per week?                                                                                                                 | 0.50       | -43.6 (-98.2 - 11.0)                           | 0.6     |
| Do you drink 7 or more glasses of wine per week?                                                                                                                       | 0.17       | -41 (-114 - 32.6)                              | 0.9     |
| Do you consume 3 or more servings of fish or shellfish per week?                                                                                                       | 0.35       | -31.0 (-88.9 - 27.0)                           | 0.9     |
| Do you preferentially consume chicken, turkey, or rabbit meat instead of veal, pork, hamburger, or sausage?                                                            | 0.64       | -27.7 (-85.3 - 29.9)                           | 0.3     |
| Do you consume more than 4 tablespoons of olive oil in a given day?                                                                                                    | 0.18       | -7.65 (-79.3 - 64.0)                           | 0.9     |
| <b>Total Medi Score</b>                                                                                                                                                | 7.8        | -25.6 (-37.2- -14)                             | <0.001  |
| MIND Dietary Adherence Questionnaire                                                                                                                                   |            |                                                |         |
| How often do you consume nuts?                                                                                                                                         | 0.67       | -198 (-276 - -120)                             | <0.001  |
| How often do you consume green leafy vegetables?                                                                                                                       | 0.51       | -196 (-273 - -118)                             | <0.001  |
| How often do you consume other vegetables?                                                                                                                             | 0.57       | -190 ( -262 - -119)                            | <0.001  |
| How often do you consume berries?                                                                                                                                      | 0.67       | -119 (-184 - -54.4)                            | 0.03    |
| How often do you consume beans?                                                                                                                                        | 0.34       | -111(-195- -27.8)                              | 0.07    |
| How often do you consume wine?                                                                                                                                         | 0.43       | -99.5 (-175- -23.6)                            | 0.08    |
| How often do you consume non-fried fish?                                                                                                                               | 0.61       | -93.6 (-164- -23.6)                            | 0.08    |
| How often do you consume whole grains?                                                                                                                                 | 0.53       | -71.7 (-137 - -6.80)                           | 0.2     |
| How often do you consume olive oil?                                                                                                                                    | 0.76       | -52.7 ( -117 - 11.7)                           | 0.6     |
| How often do you consume non-fried poultry?                                                                                                                            | 0.61       | 60.1 (-5.33 - 125)                             | 0.4     |
| How often do you consume pastries and sweets                                                                                                                           | 0.78       | 114 (195- 32.8)                                | 0.06    |
| How often do you consume fast fried food?                                                                                                                              | 0.94       | 211 (263- 59.1)                                | 0.06    |
| How often do you consume cheese?                                                                                                                                       | 0.65       | 246 (338 - 154)                                | <0.001  |
| How often do you consume red meat and related products?                                                                                                                | 0.90       | 254 (379- 130)                                 | <0.001  |
| How often do you consume butter or margarine?                                                                                                                          | 0.84       | 273 (370 - 177)                                | <0.001  |
| <b>Total MIND Score</b>                                                                                                                                                | 9.8        | -52 (-66.4 - -39.4)                            | <0.001  |

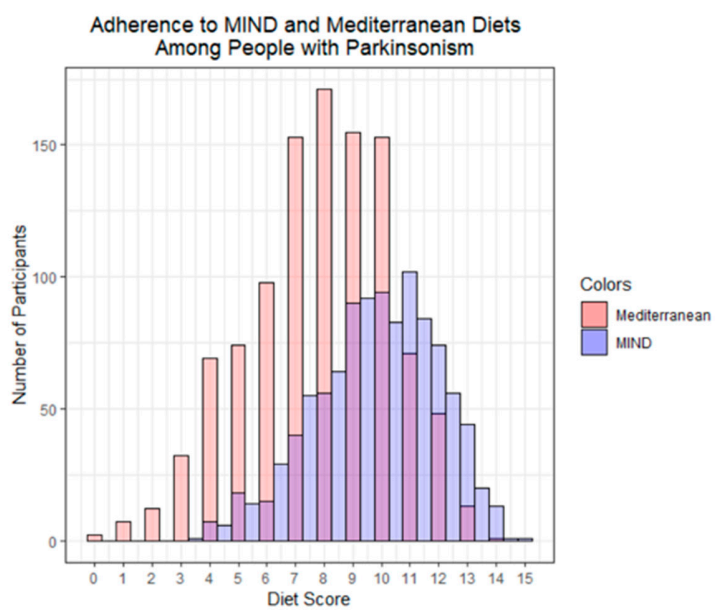

**Figure S1:** Mediterranean and MIND diet score distribution among individuals with Parkinsonism
